# Supplementary material for: Rhizobium leguminosarum HupE is a highly-specific diffusion facilitator for nickel uptake
Source: Royal Society of Chemistry journal article supplement (doi:10.1039/c4mt00298a), 2015-01-01
Supplement: c4mt00298a1.pdf [file c4mt00298a1.pdf]

## Supplementary material

### ***Rhizobium leguminosarum* HupE is a highly-specific diffusion facilitator for nickel uptake**

Marta Albareda<sup>1</sup>, Agnès Rodrigue<sup>2</sup>, Belén Brito<sup>1</sup>, Tomás Ruiz Argüeso<sup>1</sup>, Juan Imperial<sup>1,3</sup>,  
Marie-Andrée Mandrand-Berthelot<sup>2</sup> \*, and Jose Palacios<sup>1,\*</sup>

Table S1: Oligonucleotides used in this study

Figure S1: Detection of wild-type and mutated forms of HupE in *E. coli*

Table S1. Primers used in this work

| <b>Primer</b> | <b>Sequence (5'-3')</b>                   |
|---------------|-------------------------------------------|
| HupE_D42_F    | GCGGCCTGAATCATATCCTGGCGATGGT              |
| HupE_D42_R    | ACCATCGCCAGGATATGATTGAGGCCGC              |
| HupE_E90_F    | CCGATGGTCCAAACTGCAATCGCGCTGA              |
| HupE_E90_R    | GCGCGATTGCAGTTTGGACCATCGGCAG              |
| HupE_F69_F    | TCGTGCCCTCCGCCGCCGTCATCGTCAT              |
| HupE_F69_R    | ATGACGATGACGGCGGGAGGGCACGA                |
| HupE_E133_F   | GCATCCAGTTGCCGACAATGTCAAACGC              |
| HupE_E133_R   | GCGTTTGACATTGTCTGGCAACTGGATGC             |
| EChupE1-Kpn   | GGTACCAGGAGGAATTCACCATGAAGTATAG<br>TAAGAT |
| pN35-X        | AAATCTAGAGTTGAGACCCGCAAGCG                |
| pT56-X        | AAATCTAGACGTCGAGGCCCAGAAGC                |
| pK60-X        | AAATCTAGACTTGCCGCCCAGCGTCG                |
| pE82-X        | AAATCTAGACTCGATACCCAGGACGC                |
| pE107-X       | AAATCTAGACTCGAAGGCCACCAGCA                |
| pI110-X       | AAATCTAGAAATCTTCACCTCGAAGG                |
| pF125-X       | AAATCTAGAGAAGAGCGCGCATATGC                |
| pL134-X       | AAATCTAGACAACTCGATGCCATGGA                |
| pA140-X       | AAATCTAGACGCGTTTGACATTGTCG                |
| pR165-X       | AAATCTAGACCTCAGCGAAGCCAGCC                |
| pK168-X       | AAATCTAGATTTGCCGAACCTCAGCG                |
| pL188-X       | AAATCTAGACAGTGCCGCGCCGGCCA                |
| pG191-X       | AAATCTAGAGCCGACCAGCAGTGCCG                |

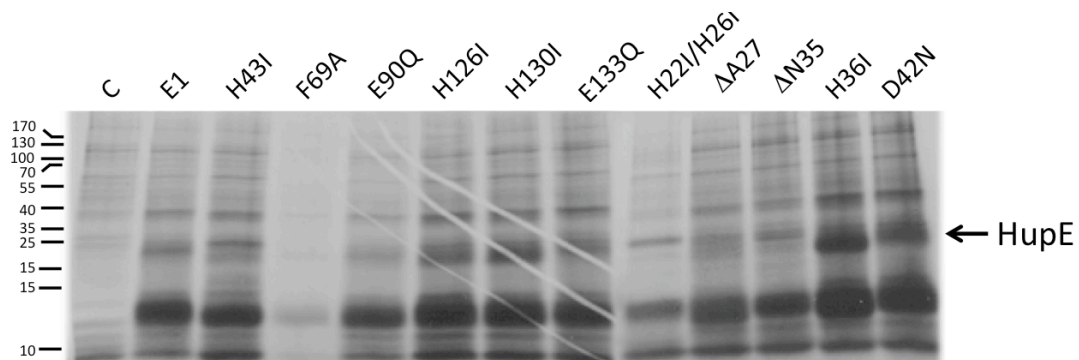

**Figure S1. Detection of wild type and mutated forms of HupE in *E. coli*.** The picture is an autoradiogram of a gel containing extracts of  $^{35}\text{S}$ -labelled *E. coli* cells expressing HupE protein (E1) or HupE variants with the indicated site-directed mutations. Lane labelled as C corresponds to a negative control of *E. coli* cells bearing the pBAD18-km vector with no insert. The position of HupE is shown on the right margin. Marks at the left of the gel indicate the position of molecular size markers of the indicated size. The gel contained 12.5% acrylamide and 6M urea. For unknown reasons the 15 kDa marker gave two separate bands.
